# Supplementary material for: Bile salt-surface active ionic liquid mixtures: mixed micellization and solubilization of phenothiazine
Source: Royal Society of Chemistry journal article supplement (doi:10.1039/c5ra09812b), 2015-01-01
Supplement: c5ra09812b1.pdf [file c5ra09812b1.pdf]

## Supporting Information

### **Bile Salt-Surface Active Ionic Liquid Mixtures; Mixed Micellization and Solubilization of Phenothiazine**

**Rajni Vashishat, Reshu Sanan and Rakesh Kumar Mahajan\***

Department of Chemistry, UGC-Centre for Advanced Studies

Guru Nanak Dev University, Amritsar-143005 (INDIA)

---

\*Corresponding author, Fax: +91 183 2258820

E-mail address: [rakesh\\_chem@yahoo.com](mailto:rakesh_chem@yahoo.com) (R.K.Mahajan)

## Evaluation of Thermodynamic Parameters

Various thermodynamic parameters have also been evaluated for the aqueous bile salt-SAIL mixtures. The standard free energy of micellization ( $\Delta G_m^0$ , change in free energy accompanying the formation of 1 mole of micelles at a temperature of 298.15 K) and standard free energy of adsorption ( $\Delta G_{ads}^0$ , work done to transfer the surfactant molecules in the monomeric form at the surface to the micellar stage through the aqueous medium at 298.15 K) have been computed using equations (1) and (2) respectively as

$$\Delta G_m^0 = RT \ln X_{cmc} \quad (1)$$

$$\Delta G_{ads}^0 = (\Delta G_m^0) - \left( \frac{\pi_{cmc}}{\tau_{max}} \right) \quad (2)$$

Where  $X_{cmc}$  is the cmc in mole fraction units. The  $\Delta G_m^0$  and  $\Delta G_{ads}^0$  values for NaC, NaDC, C<sub>12</sub>mimBr and their binary mixtures are given in Table S1 below. Negative values of both  $\Delta G_m^0$  and  $\Delta G_{ads}^0$  confirm the spontaneity and feasibility of the micellization as well as adsorption phenomenon in NaC/NaDC + C<sub>12</sub>mimBr mixtures. The more negative values of  $\Delta G_{ads}^0$  relative to  $\Delta G_m^0$  indicate the more spontaneity of the monolayer formation at air-water interface than the micellization phenomenon. Hence, adsorption of mixed surfactants at air-water interface is primary process whereas micellization is secondary so work needs to be done to transfer the surfactant molecules at interface to the micelles through aqueous medium. The  $\Delta G_m^0$  and  $\Delta G_{ads}^0$  values for the mixtures of NaC/NaDC with C<sub>12</sub>mimBr are found to be higher in magnitude than the pure components hinting at the greater stability of the mixed micelles and the mixed monolayer respectively. As mentioned earlier, the micelles in the mixtures containing 0.4:0.6 mole fraction ratio of NaC/NaDC and C<sub>12</sub>mimBr are the most stable ones. Further free energy at equilibrium ( $G_{min}^s$ ) and excess free energy ( $\Delta G_{ex}$ ) have been computed using equations (3) and (4) respectively.

$$G_{min}^s = A_{min} \gamma_{cmc} N_A \quad (3)$$

$$\Delta G_{ex} = [X_1^m \ln f_1^m + (1 - X_1^m) \ln f_2^m] RT \quad (4)$$

The  $G_{\min}^s$  values accounts for the synergism in mixed adsorbed monolayer formed. The  $G_{\min}^s$  value for  $C_{12}\text{mimBr}$  is low but found to increase with increase in the mole fraction of bile salts, suggesting the enhanced favorable interactions in mixed monolayer of NaC/NaDC with  $C_{12}\text{mimBr}$ . Also negative values of  $\Delta G_{\text{ex}}$  for the various binary mixtures of NaC/NaDC with  $C_{12}\text{mimBr}$  indicate the higher spontaneity and stability of mixed micelles, which is greater for NaDC +  $C_{12}\text{mimBr}$  mixtures.

Hence, to conclude the aqueous binary mixtures of NaC/NaDC with  $C_{12}\text{mimBr}$  exhibit strong synergistic activity both in the mixed micelles and at the mixed monolayer in comparison to their pure counter parts, owing to the presence of strong hydrophobic and electrostatic forces between the oppositely charged amphiphiles. These favorable interactions are however found to be highest in case of mixtures containing mole fraction ratios of NaC/NaDC :  $C_{12}\text{mimBr}$  to be 0.4:0.6. The size of the mixed micelles at this mixture composition is also found to be largest.

**Table S1** Thermodynamic parameters: standard free energy of micellization ( $\Delta G_{\text{m}}^{\circ}$ ), standard free energy of adsorption ( $\Delta G_{\text{ad}}^{\circ}$ ), surface free energy ( $G_{\min}^s$ ), excess free energy ( $\Delta G_{\text{ex}}$ ) of binary mixtures of bile salts (NaC and NaDC) with SAIL ( $C_{12}\text{mimBr}$ )

| $\alpha_{\text{BileSalts}}$ | $\Delta G_{\text{m}}^{\circ}$<br>(kJ mol <sup>-1</sup> ) | $\Delta G_{\text{ad}}^{\circ}$<br>(kJ mol <sup>-1</sup> ) | $G_{\min}^s$<br>(kJ mol <sup>-1</sup> ) | $\Delta G_{\text{ex}}$<br>(kJ mol <sup>-1</sup> ) |
|-----------------------------|----------------------------------------------------------|-----------------------------------------------------------|-----------------------------------------|---------------------------------------------------|
| NaC + $C_{12}\text{mimBr}$  |                                                          |                                                           |                                         |                                                   |
| 0.0                         | -21.29                                                   | -36.07                                                    | 12.79                                   | -                                                 |
| 0.2                         | -26.00                                                   | -53.55                                                    | 27.40                                   | -5.53                                             |
| 0.4                         | -26.36                                                   | -52.56                                                    | 25.97                                   | -5.83                                             |
| 0.6                         | -26.14                                                   | -56.31                                                    | 30.49                                   | -5.49                                             |
| 0.8                         | -25.44                                                   | -49.89                                                    | 24.52                                   | -5.28                                             |
| 1.0                         | -20.20                                                   | -46.27                                                    | 42.27                                   | -                                                 |
| NaDC + $C_{12}\text{mimBr}$ |                                                          |                                                           |                                         |                                                   |
| 0.0                         | -21.29                                                   | -36.07                                                    | 12.79                                   | -                                                 |
| 0.2                         | -27.18                                                   | -51.05                                                    | 20.02                                   | -6.17                                             |
| 0.4                         | -27.75                                                   | -53.97                                                    | 22.09                                   | -6.33                                             |
| 0.6                         | -27.43                                                   | -54.98                                                    | 22.78                                   | -6.09                                             |

|     |        |        |       |       |
|-----|--------|--------|-------|-------|
| 0.8 | -27.00 | -53.05 | 22.92 | -5.83 |
| 1.0 | -22.00 | -53.73 | 44.05 | -     |

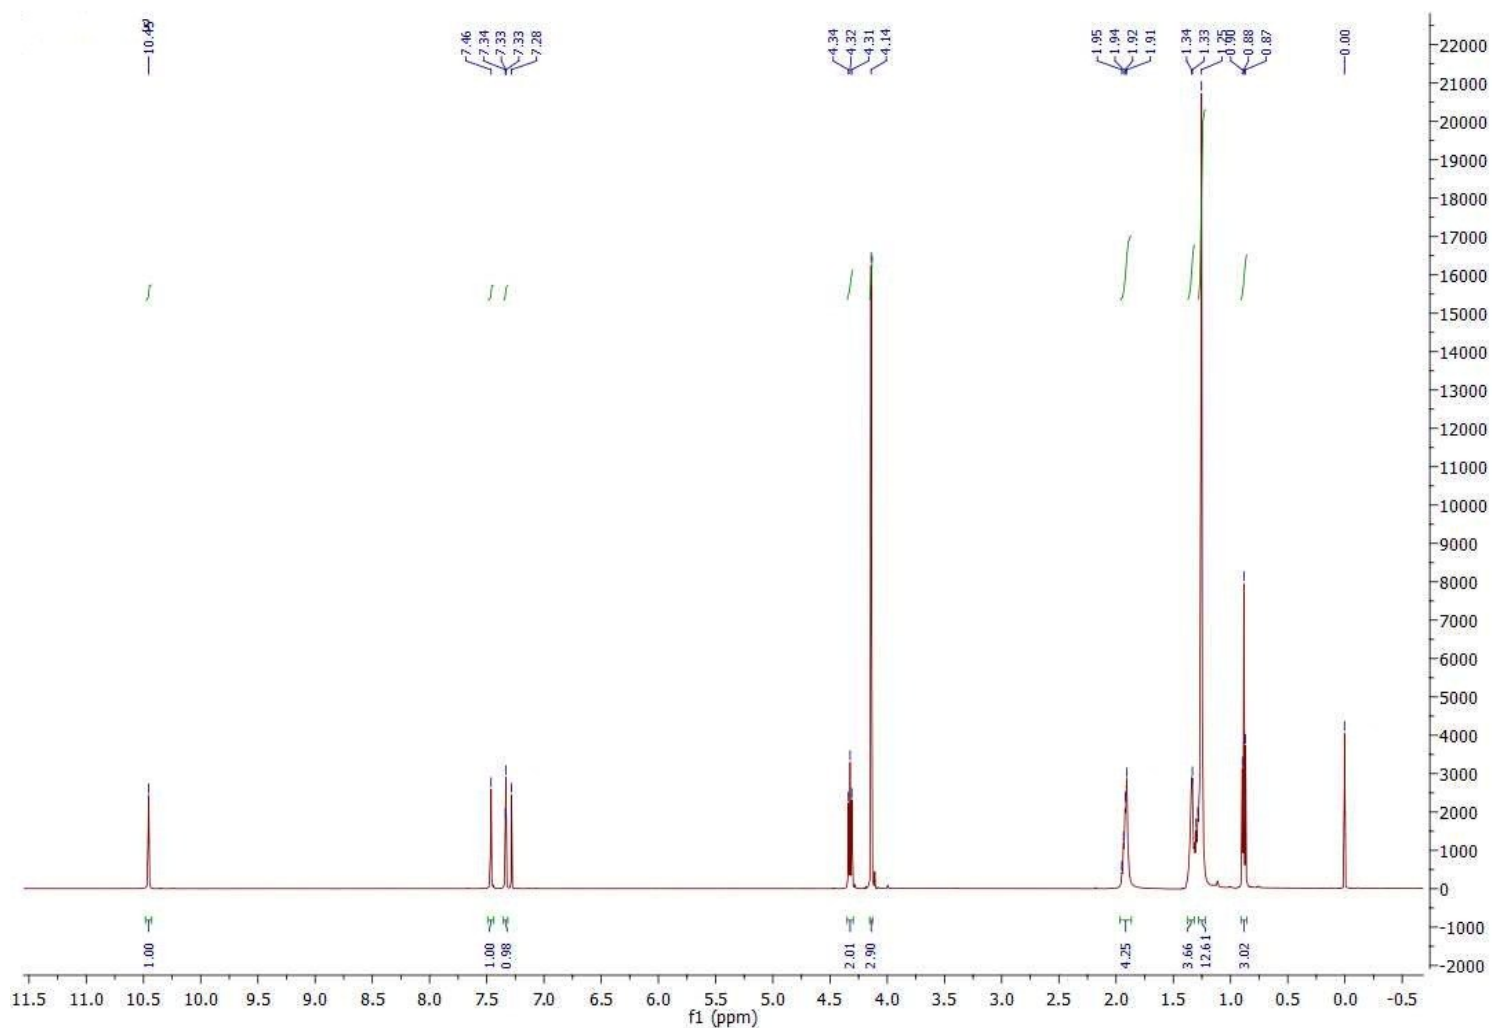

**Fig. S1**  $^1\text{H}$  NMR profile of 1-dodecyl-3-methylimidazolium bromide ( $\text{C}_{12}\text{mimBr}$ ) in  $\text{CDCl}_3$

**Characterization of  $\text{C}_{12}\text{mimBr}$**  :  $^1\text{H}$  NMR spectra of  $\text{C}_{12}\text{mimBr}$  was recorded on 500 MHz NMR in  $\text{CDCl}_3$ .  $\text{C}_{12}\text{mimBr}$  contains total 31 protons and the details of chemical shift ( $\delta$ ) and coupling constant ( $J$ ) of protons are as:

$\delta = 10.5$  (s, 1H),  $\delta = 7.46$  (s, 1H),  $\delta = 7.33$  (t,  $J = 5.0$  Hz, 1H),  $\delta = 4.32$  (t,  $J = 5.0$  Hz, 2H),  $\delta = 4.14$  (s, 3H),  $\delta = 1.91$ - $1.94$  (m, 4H),  $\delta = 1.25$ - $1.34$  (m, 16H),  $\delta = 0.88$  (t,  $J = 5.0$  Hz, 3H)

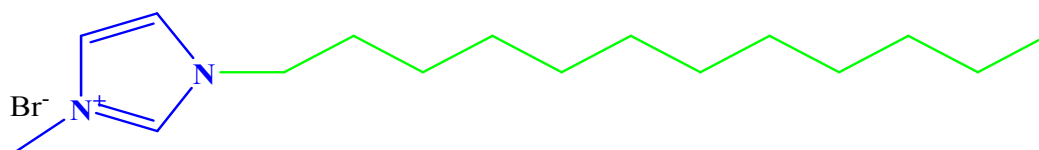

(a) 1-dodecyl-3-methylimidazolium bromide (C<sub>12</sub>mimBr)

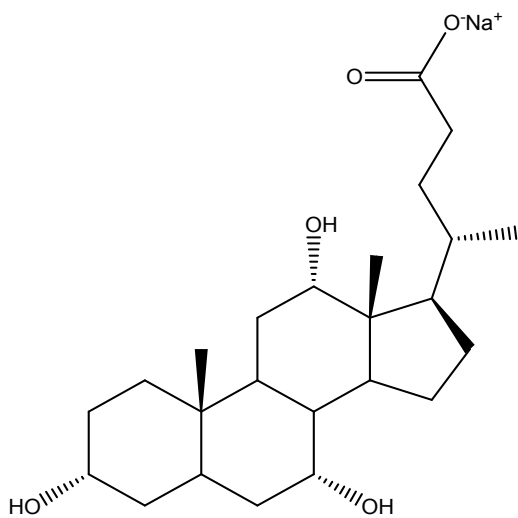

(b) Sodium Cholate (NaC)

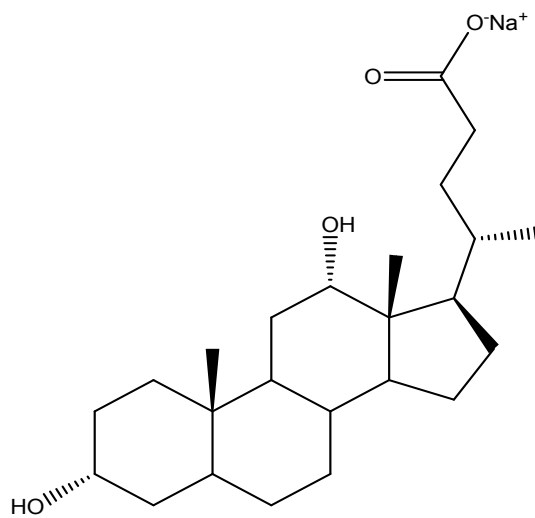

(c) Sodium Deoxycholate (NaDC)

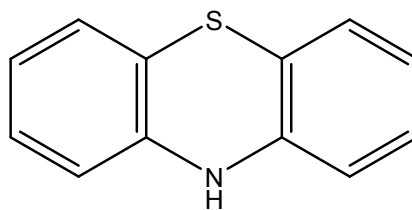

(d) Phenothiazine

**Fig. S2** Basic structures of compounds used in present study

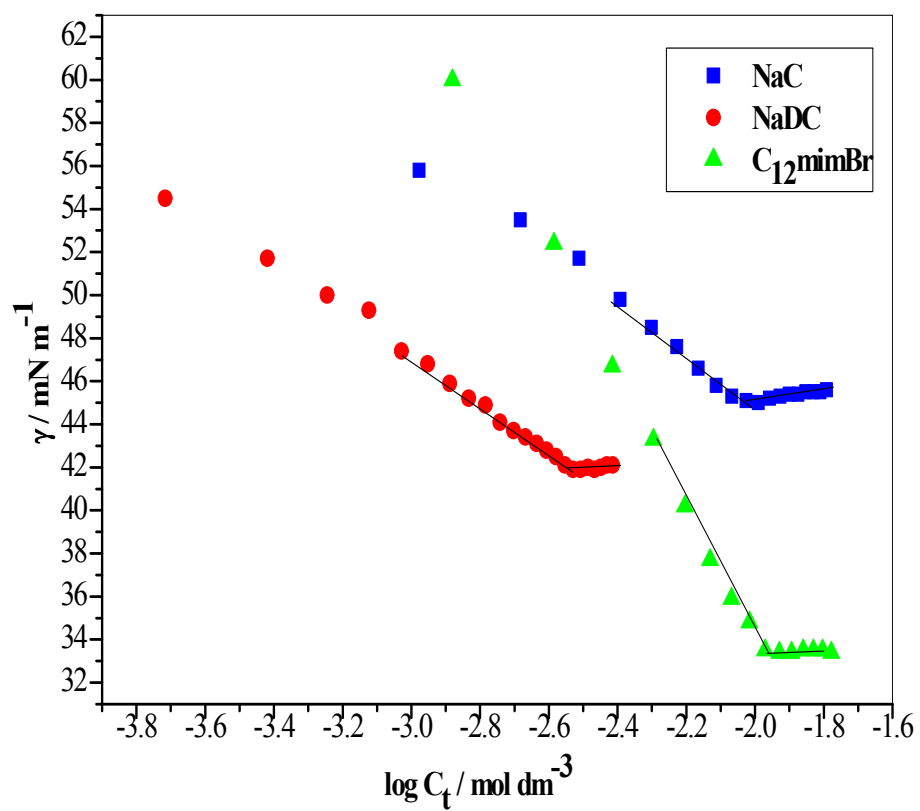

**Fig. S3** Plot of surface tension ( $\gamma$ ) vs. the logarithm of the total concentration ( $C_t$ ) of pure amphiphiles: NaC, NaDC and  $C_{12}\text{mimBr}$ .

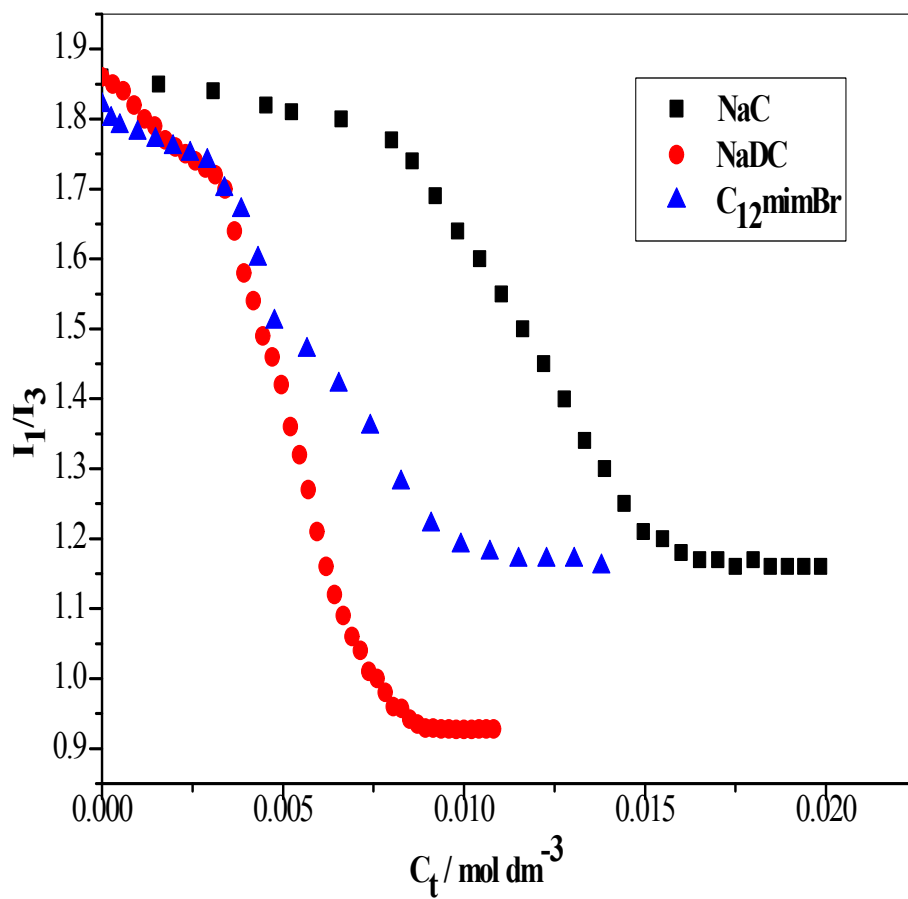

**Fig. S4** Plot of pyrene intensity ( $I_1/I_3$ ) ratio vs. the total concentration ( $C_t$ ) of pure amphiphiles: NaC, NaDC and  $C_{12}\text{mimBr}$ .



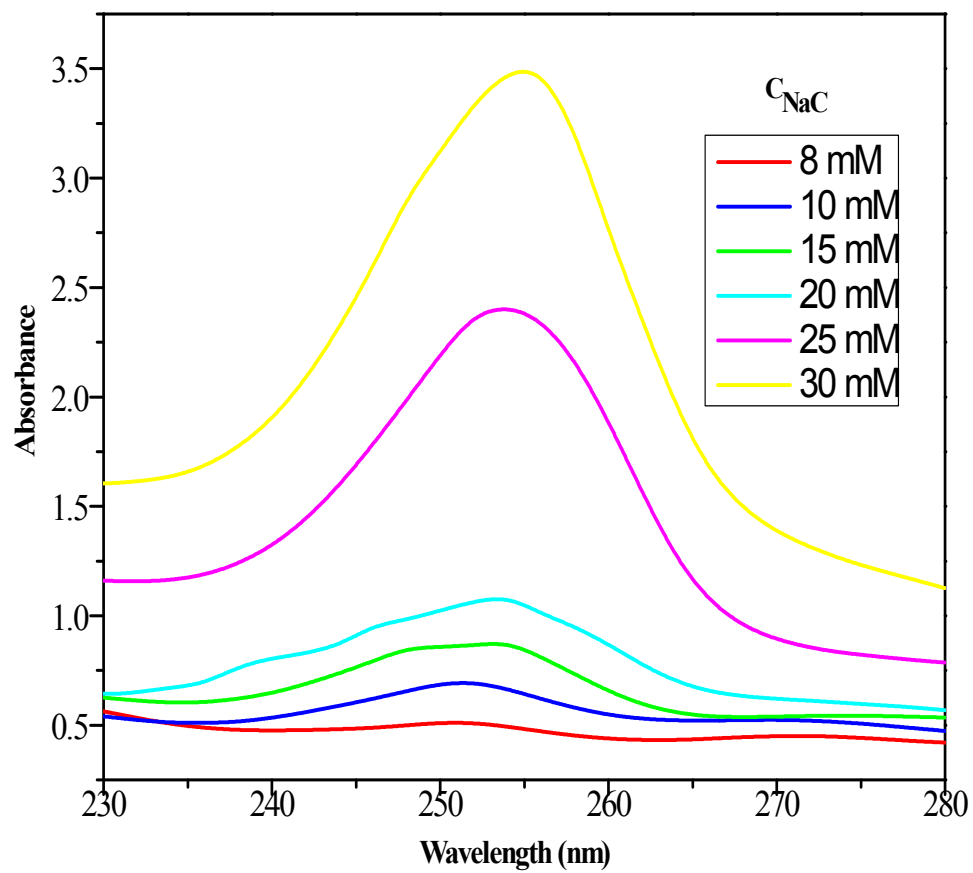

**Fig. S5** UV-visible spectra of Pz loaded NaC aqueous solutions at various concentrations of NaC

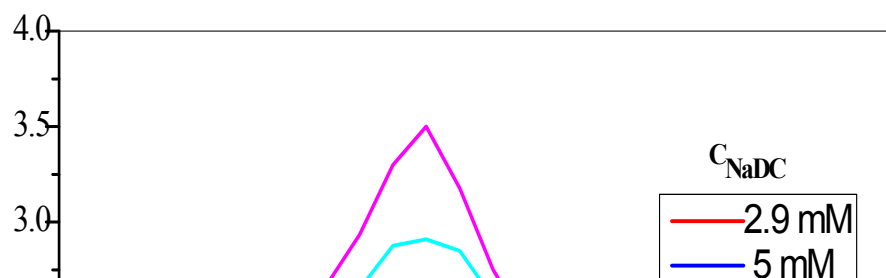

**Fig. S6** UV-visible spectra of Pz loaded NaDC aqueous solutions at various concentration of NaDC

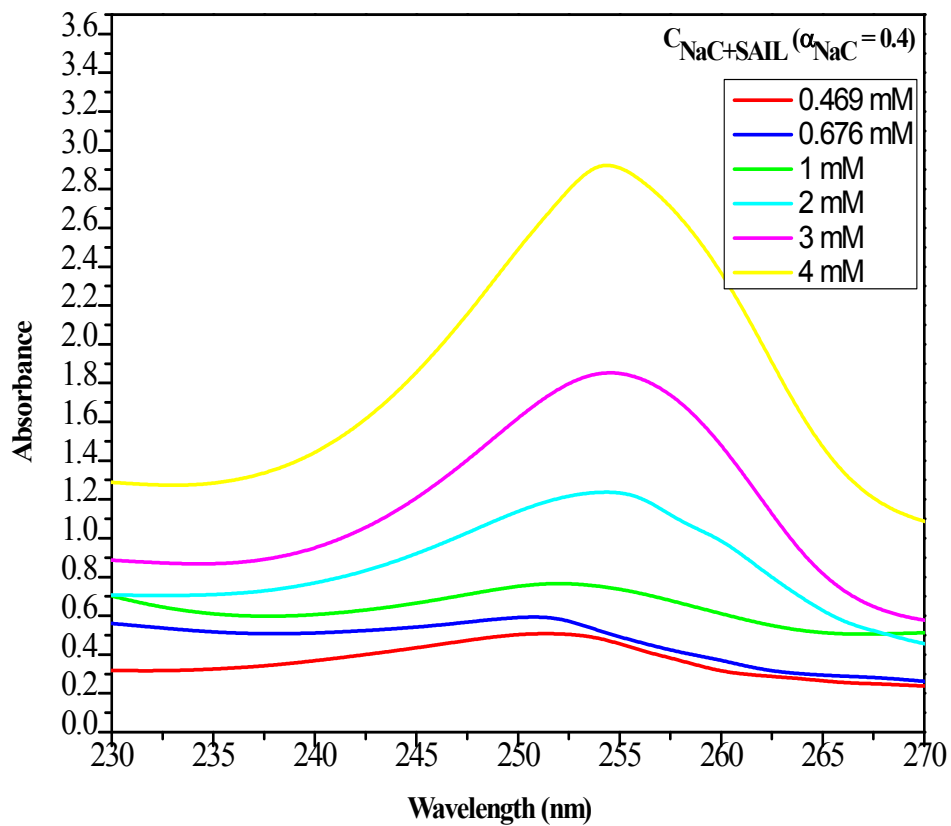

**Fig. S7** UV-visible spectra of Pz loaded binary mixture of NaC+SAIL ( $\alpha_{NaC} = 0.4$ ) at various concentrations of NaC+SAIL mixture

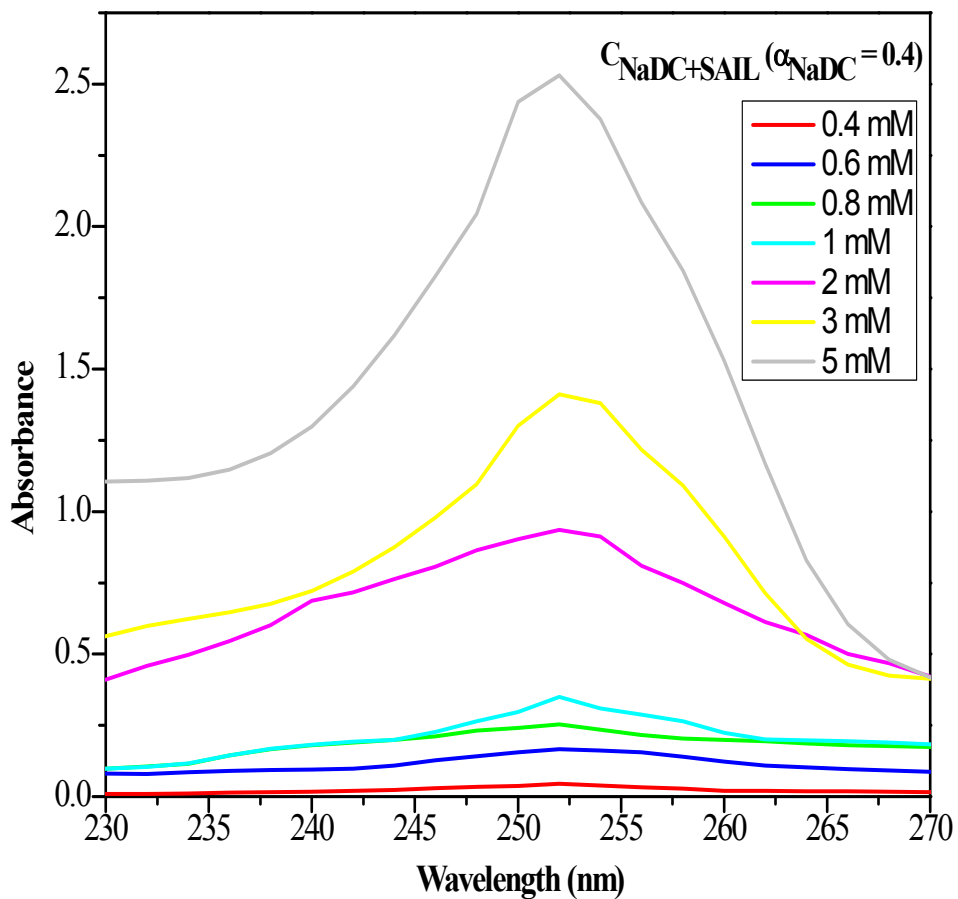

**Fig. S8** UV-visible spectra of Pz loaded binary mixture of NaDC+SAIL ( $\alpha_{\text{NaDC}} = 0.4$ ) at various concentrations of NaDC+SAIL mixture
